# Supplementary material for: Unveiling a growth temperature-dependent ultra-sensitive tetragonal scheelite BiVO4 thin film-based gas sensor for ammonia volatilization at room temperature
Source: Royal Society of Chemistry journal article supplement (doi:10.1039/d4ra08169b), 2024-01-01
Supplement: d4ra08169b1.pdf [file d4ra08169b1.pdf]

# **Unveiling the growth temperature dependent ultra-sensitive tetragonal scheelite BiVO<sub>4</sub> thin film-based gas sensor for ammonia volatilization at room temperature**

Santhosh Nallakumar <sup>a</sup>, Logu Thirumalaisamy <sup>b</sup>, Sivaperuman Kalainathan <sup>c</sup>, Vijaya B <sup>a</sup>, Anand Sekar <sup>a</sup>,  
Muthurakku Usha Rani <sup>a\*</sup>

<sup>a</sup>Department of Physics, School of Advanced Sciences, VIT, Vellore, 632014, India.

<sup>b</sup>Department of Physics, G.T.N Arts College (Affiliated to Madurai Kamaraj University), Dindigul, India.

<sup>c</sup>Centre for Nanotechnology Research, VIT, Vellore, 632014, India

\*Authors to whom correspondence should be addressed

E-mail: usharani.m@vit.ac.in

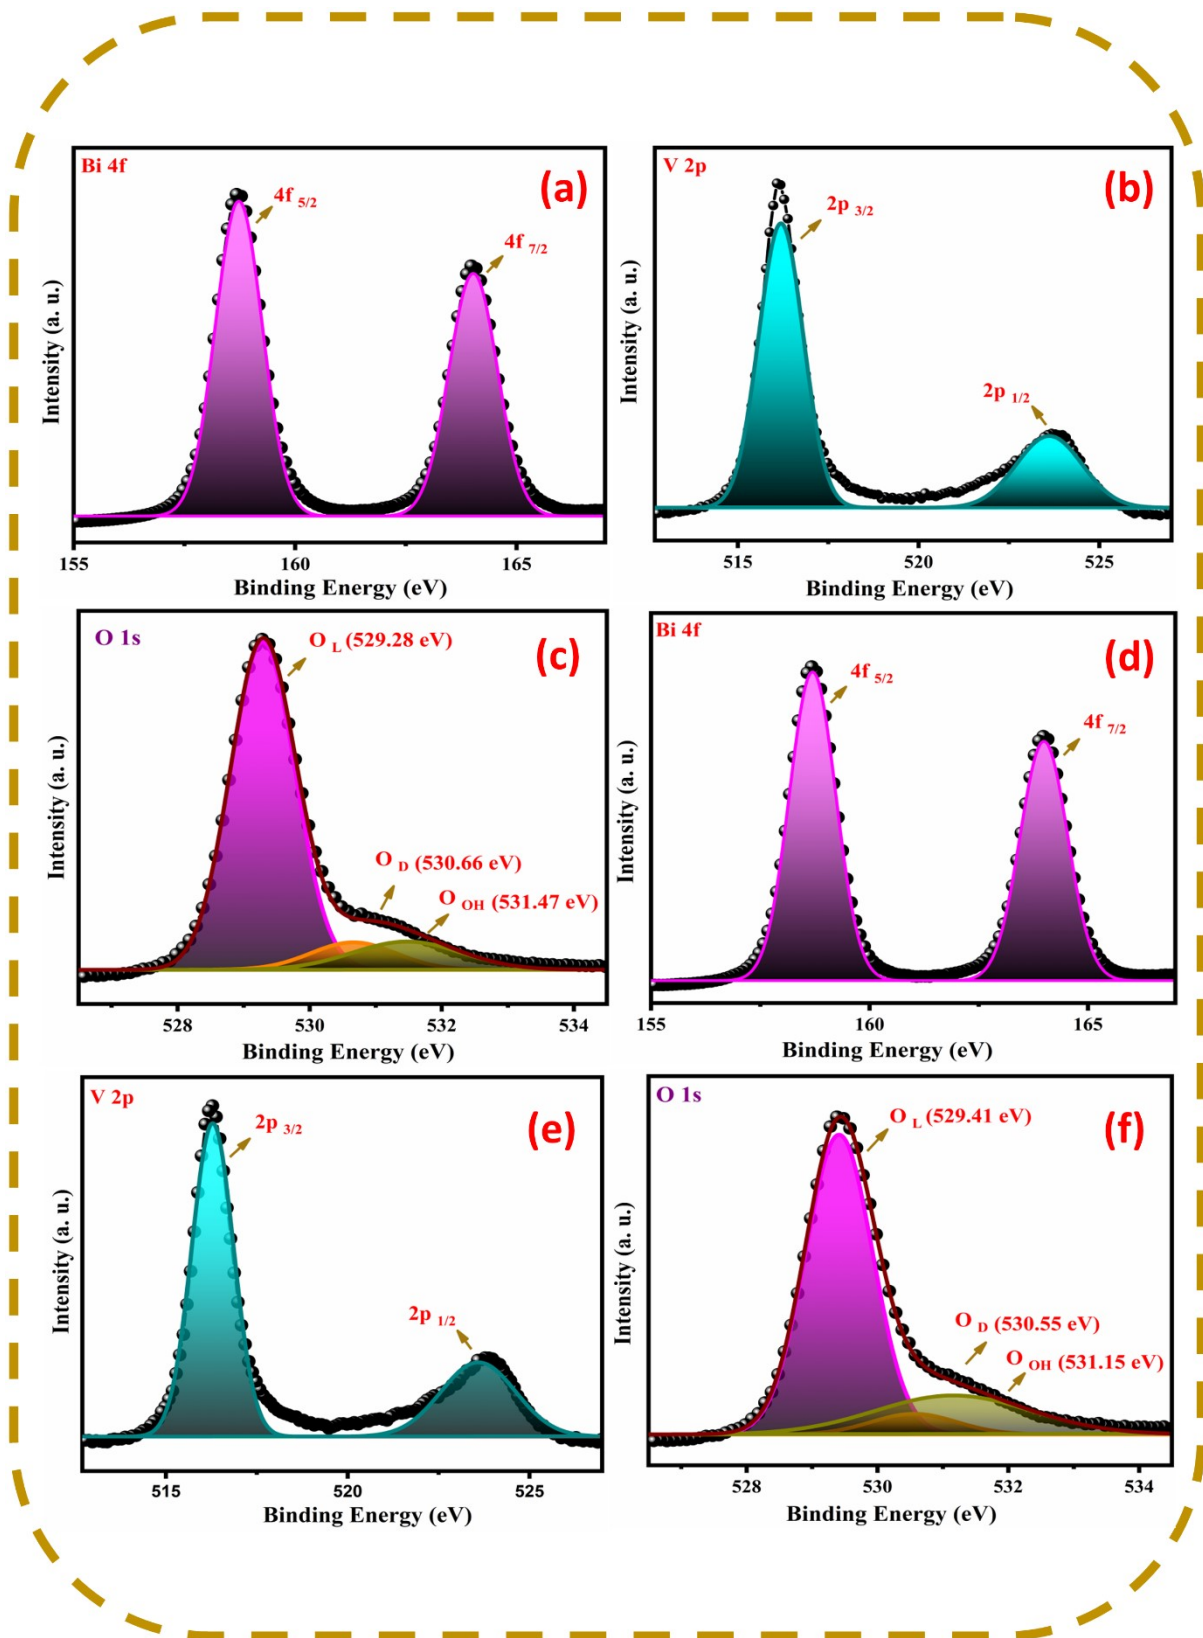

Fig. 1 (a, d) depicts the Individual scan of Bi 4f, (b, e) represents the core scans of the V 2p and (c, f) shows the core scans of O 1s, respectively.

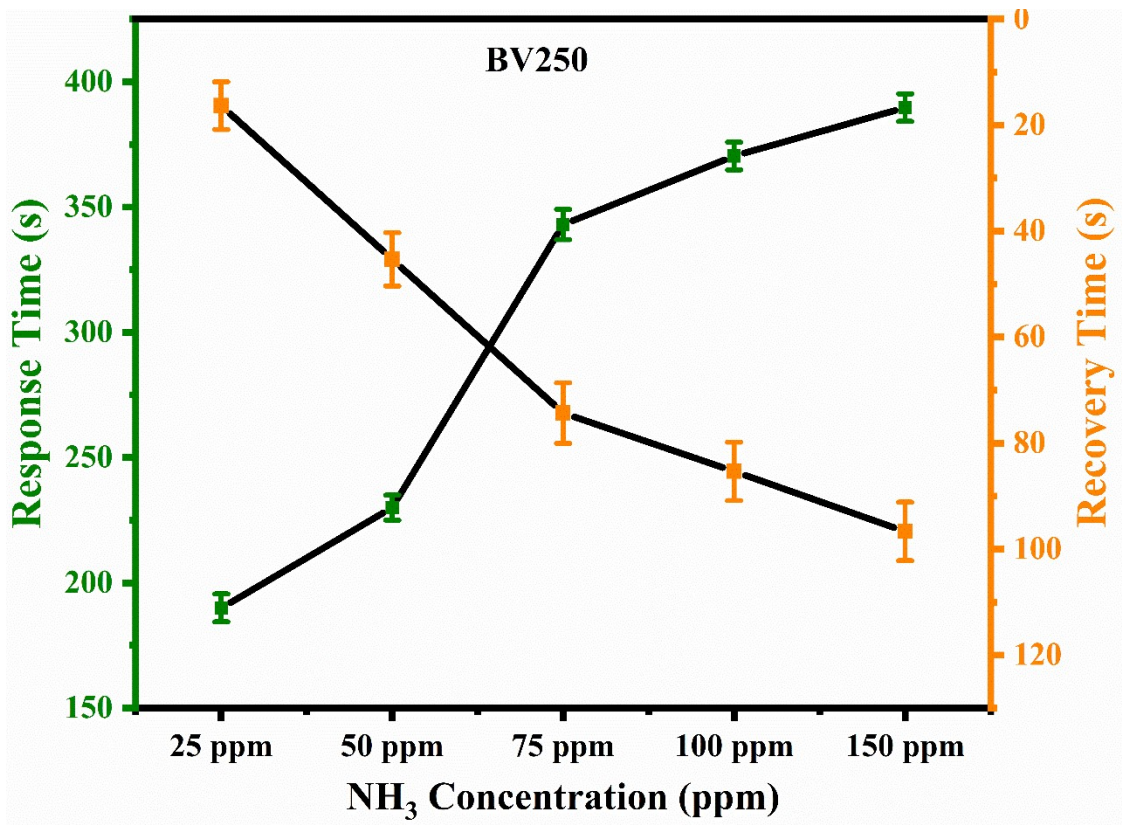

Fig. 2, shows the response and recovery times of BV250.

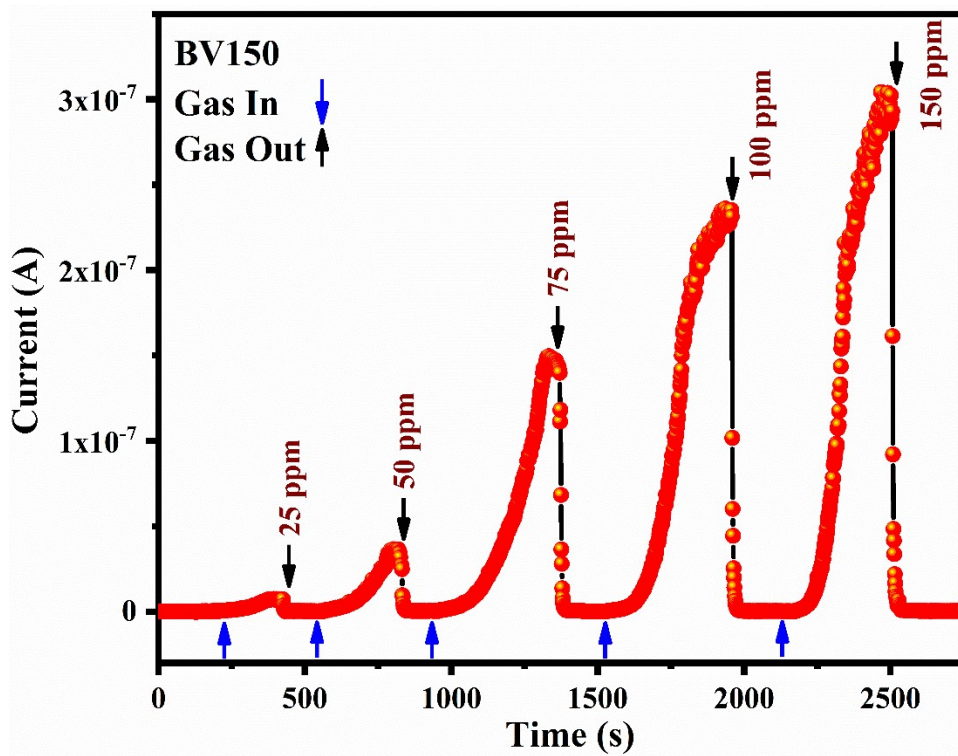

Fig. 3, depicts dynamic response curves of BV150 film.

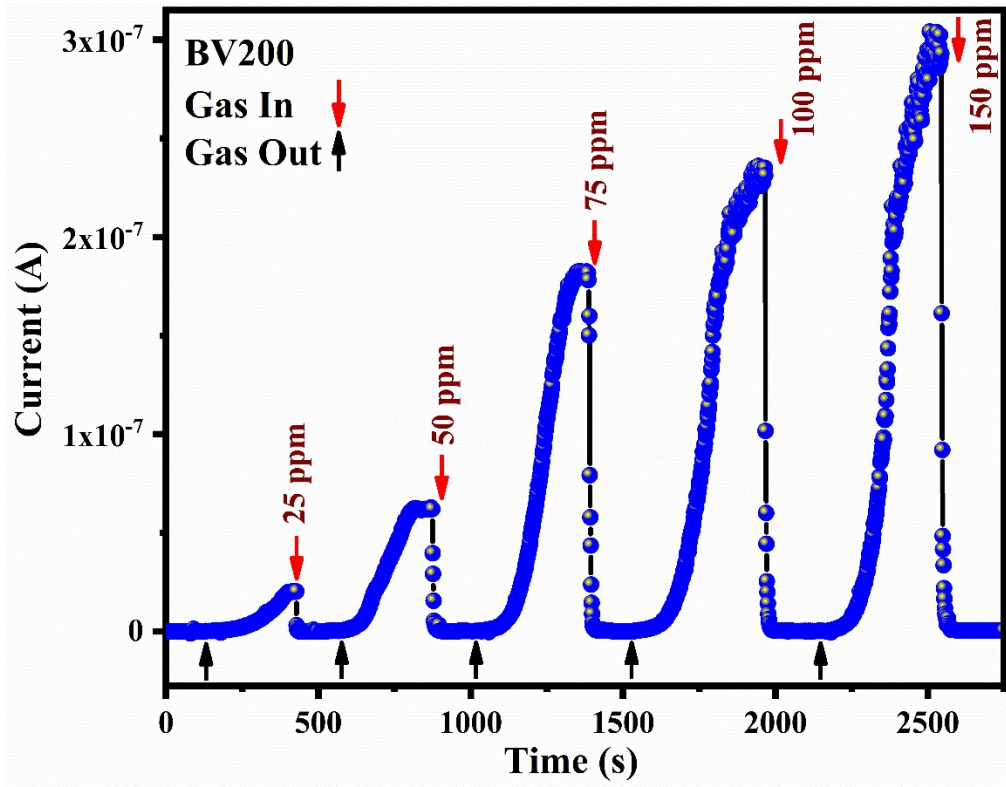

Fig. 4, depicts dynamic response curves of BV200 film.
